# Supplementary material for: AdpA, key regulator for morphological differentiation regulates bacterial chromosome replication
Source: PubMed Central journal article supplement (PMC3411110; doi:10.1098/rsob.120097), 2012-07

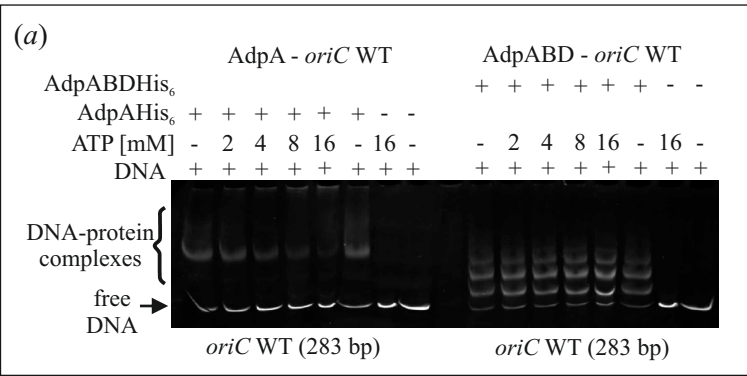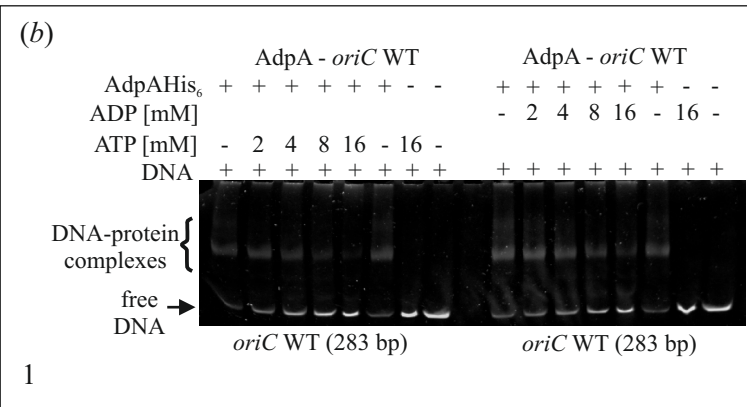

Supplement: rsob120097-s1.pdf [file rsob120097-s1.pdf]
